# Supplementary material for: Report of a Scientific Working Group on Serious Adverse Events following Mectizan® treatment of onchocerciasis in Loa loa endemic areas
Source: Springer Nature journal article supplement (doi:10.1186/1475-2883-2-s1-s2), 2003-10-24
Supplement: Additional file 1 [file 1475-2883-2-s1-s2-s1.pdf]

# **Scientific Working Group on SAEs in *Loa loa* endemic areas**

The Shrigley Hall Hotel, Manchester, UK

28-30 May 2002

## Final Agenda

- 1) Introduction**
- 2) Review of previous consultations on *Loa loa* associated SAEs**
- 3) Mapping of *L. loa***
  - 3.1 Remote sensing
  - 3.2 RAPLOA validation
- 4) Recent advances in knowledge about SAEs in *L. loa* endemic areas**
  - 4.1 Review of reported cases
  - 4.2 Clinical picture, epidemiology & outcome
  - 4.3 Immunopathology & immunogenetics
  - 4.4 Pathogenic role of *Wolbachia*
- 5) Onchocerciasis-related SAEs**
- 6) Risk factors for SAEs**
  - 1.1 Analysis of reported cases
  - 1.2 Pharmacologic neurotoxicity
  - 6.3 Alcohol
- 7) A risk-management approach to SAEs**
  - 1.1 Risk group identification approaches
  - 1.2 Pre-treatment with albendazole
  - 1.3 Pre-treatment with low dose Mectizan®
- 8) Update on management of *L. loa* encephalopathy**
- 9) Health educational issues in relation to SAEs**
- 10) Review of guidelines for Mectizan® treatment in *L. loa* endemic areas**
- 11) Reporting of SAEs – improving coverage and quality**
- 12) Other Matters**

Global Programme to Eliminate Lymphatic Filariasis (GPELF)

## **Conclusions & Recommendations**

\*\*\*\* Closure \*\*\*\*
