# Supplementary material for: Report of a Scientific Working Group on Serious Adverse Events following Mectizan® treatment of onchocerciasis in Loa loa endemic areas
Source: Springer Nature journal article supplement (doi:10.1186/1475-2883-2-s1-s2), 2003-10-24
Supplement: Additional file 4 [file 1475-2883-2-s1-s2-s4.pdf]

**Scientific Working Group on SAEs in *Loa loa* endemic areas**  
The Shrigley Hall Hotel, Manchester, UK  
**28-30 May 2002**

List of Working Papers

Dr. D. Addiss  
Dr. R. Rheingans  
Dr. F. Richards  
& Dr. N.A.Y. Twum-Danso

A Framework for Decision-Making for Mass Distribution of Mectizan® in Areas Endemic for *Loa loa*

Dr. K. Awadzi

Clinical picture and outcome of Serious Adverse Events in the treatment of Onchocerciasis

Dr. M. Boussinesq

Clinical picture, epidemiology and outcome of *Loa*-associated serious adverse events related to mass ivermectin treatment of onchocerciasis in Cameroon

Dr. K. Brown

Not presented

Dr. G. Edwards

Ivermectin: does P-glycoprotein play a role in neurotoxicity?

Dr. C.D. Mackenzie  
Dr. T.G. Geary  
Dr. J. Gerlach

Possible pathogenic pathways in the adverse clinical events seen following ivermectin administration to onchocerciasis patients.

Ms. N. Haselow  
Ms. J. Akame  
Mr. C. Evini

& Mr. S. Akongo

Programmatic and Communication Issues in Relation to Serious Adverse Events Following Ivermectin Treatment in areas Co-endemic for Onchocerciasis and Loiasis

Dr. N.A.Y. Twum-Danso

Serious adverse events following treatment with ivermectin for onchocerciasis control: a review of reported cases

Dr. N.A.Y. Twum-Danso

Loa loa encephalopathy temporally related to ivermectin administration reported from onchocerciasis mass treatment programs from 1989 to 2001: implications for the future
