# Supplementary material for: Report of a Scientific Working Group on Serious Adverse Events following Mectizan® treatment of onchocerciasis in Loa loa endemic areas
Source: Springer Nature journal article supplement (doi:10.1186/1475-2883-2-s1-s2), 2003-10-24
Supplement: Additional file 5 [file 1475-2883-2-s1-s2-s5.pdf]

Distribution of *Loa loa*: predicted and observed (from Thompson *et al.*, 2001)

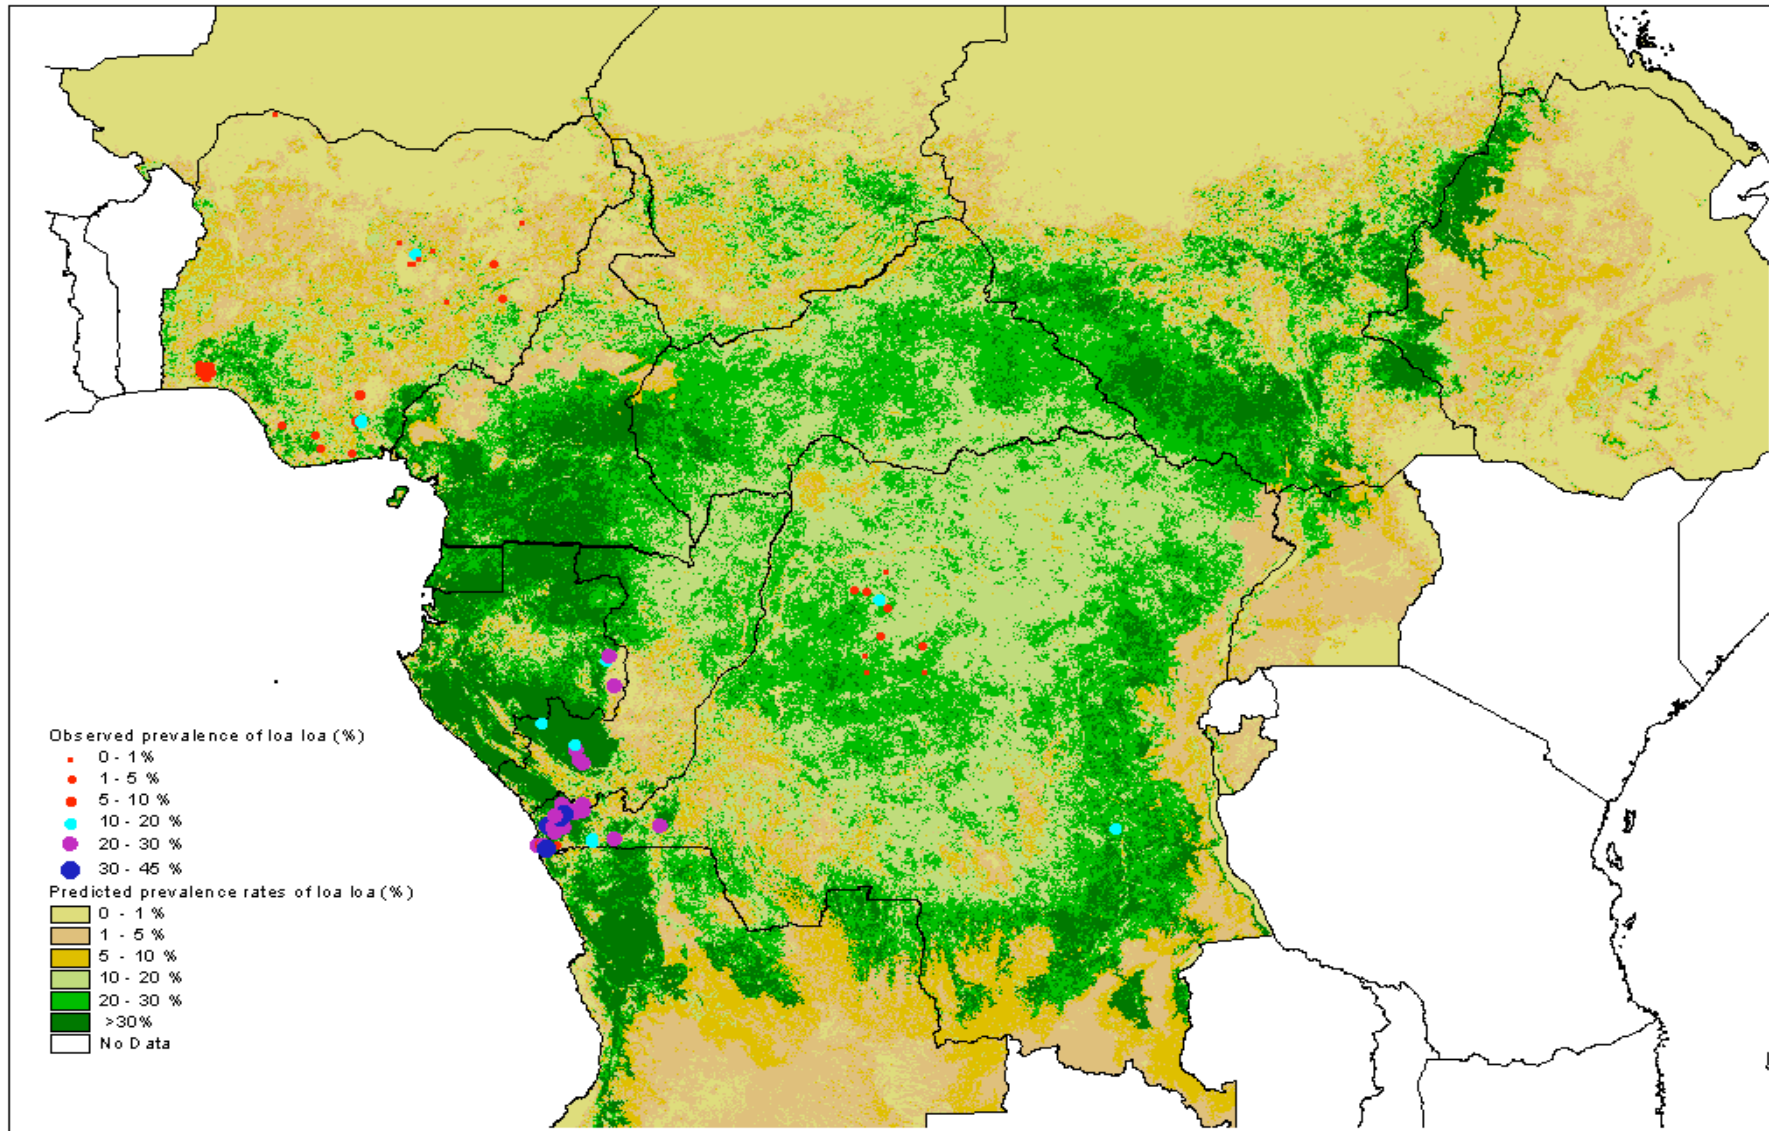

From: Thomson M, Obsomer V, Connor SJ *et al.* (2001) Determining the spatial overlap between the distribution of *Loa loa* and onchocerciasis in APOC countries using GIS and Remote Sensing Technologies: Final Report to APOC 15/10/2001. Liverpool School of Tropical Medicine, Liverpool, 2001.
